# Supplementary material for: Co-transcriptional RNA cleavage provides a failsafe termination mechanism for yeast RNA polymerase I
Source: PubMed Central journal article supplement — Nucleic Acids Res. 2010 Oct 22;39(4):1439–48. doi: 10.1093/nar/gkq894 (PMC3045592; doi:10.1093/nar/gkq894), 2010-10-22

## SUPPLEMENTARY DATA

### Supplementary methods: Pol I minigene construction

The promoter-containing fragment was produced by PCR on genomic DNA with the oligos “NotI-prom-fw” and “XhoI-prom-rev”, the human  $\beta$ -globin fragment from a plasmid containing the human  $\beta$ -globin gene with the oligos “HBfragm-XhoI-fw” and “HBfragm-SalI-rev”, the terminator fragment from genomic DNA with the oligos “XhoI-term-fw” and “KpnI-term-rev”.  $\beta$ -globin and terminator fragments were first digested with XhoI+SalI and XhoI+KpnI, respectively, then ligated between them, amplified by PCR and cloned into pBluescript SK(+) at the XhoI and KpnI sites. The promoter fragment was inserted in the vector pRS426 (NotI/XhoI). The  $\beta$ -globin + terminator fragment was then subcloned from pBluescript into this construct (XhoI/KpnI) to obtain the full WT minigene. All the terminator mutants were first prepared in pBluescript SK(+) then subcloned in the promoter-containing pRS426. Deletion of the Rnt1 cleavage site was obtained by PCR and re-ligation of the product using the oligos “TF-noRnt1-fw” and “TF-noRnt1-rev”, deletion of T1 with the oligos “TF-noT1-fw” and “TF-noT1-rev”. Ribozyme and mutant ribozyme were obtained by PCR on a plasmid template with the oligos “RZ-fw” and “RZ-rev” then cloned in place of Rnt1 cleavage site and T1 site respectively. Point Mutagenesis of the Reb1 binding site was performed using the mutagenic primers “MutReb1BS” and “MutReb1BS-anti”. The double mutant  $\Delta$ T1/mutReb1BS was obtained from the mutReb1BS construct by deletion of T1 with the oligos “TF-noT1mut-fw” and “TF-noT1-rev”. Deletion of the termination fragment was obtained from the WT construct in pRS426 by PCR and re-ligation with the oligos “noTF-fw” and “noTF-rev”. The sequence of the oligos employed is reported in Supplementary Table 2.

### Supplementary Table S1: Yeast strains

| Strain                          | Genotype                                                                                                                              |
|---------------------------------|---------------------------------------------------------------------------------------------------------------------------------------|
| BY4742 ( <i>RPA12</i> )         | Mat-a <i>his3<math>\Delta</math>1 leu2<math>\Delta</math>0 lys2<math>\Delta</math>0 ura3<math>\Delta</math>0</i>                      |
| <i>rpa12<math>\Delta</math></i> | Mat-a <i>his3<math>\Delta</math>1 leu2<math>\Delta</math>0 lys2<math>\Delta</math>0 ura3<math>\Delta</math>0 rpa12::kanMX6</i>        |
| BMA64 ( <i>RNT1</i> )           | Mat-a <i>ura3-1 trp1 ade2-1 leu2-3,112 his3-11,15</i>                                                                                 |
| <i>rnt1<math>\Delta</math></i>  | Mat-a <i>ura3-1 trp1 ade2-1 leu2-3,112 his3-11,15 rnt1::TRP1</i>                                                                      |
| J342 ( <i>pGAL-REB1</i> )       | Mat-a <i>ade2-1 his3-11,15 leu2-3,112 trp1-1 ura3-1 can1-100 reb1<math>\Delta</math>::LEU2 pBM272-41 (P<sub>GAL</sub> REB1, HIS3)</i> |
| FD4D ( <i>RAT1 SEN1</i> )       | Mat-a <i>leu2 trp1<math>\Delta</math>63 ura3</i>                                                                                      |
| <i>rat1-1 sen1-1</i>            | Mat-a <i>leu2 trp1<math>\Delta</math>63 ura3 rat1-1 sen1-1</i>                                                                        |

**Supplementary Table S2: Primer sequences**

| <b>Name</b>      | <b>Sequence (5'-3')</b>                                         |
|------------------|-----------------------------------------------------------------|
| RNaseH           | CCAGTACCCACTTAGAAAGA                                            |
| R-fw             | AAGTAGACTGAACAAGTCTCTA                                          |
| R-rev            | TCTCTAAACTAGGCCCCCGGC                                           |
| Ext-rev          | CATCAGGGGCTGTTGCCAATG                                           |
| NotI-prom-fw     | GGTTACGCGGCCGCAACGGTGCACCTGGCGGAAAG                             |
| XhoI-prom-rev    | GTCAGTCTCGAGTCGAACTTGTCTTCAACTGCTTTCG                           |
| HBfragm-XhoI-fw  | CGAGTACTCGAGGCAATGATGTATTTAAATTATTTCTG                          |
| HBfragm-Sall-rev | ATGGTTGTCGACGAATCCTTTTCTGAGGGATGAATAAG                          |
| XhoI-term-fw     | GATGATCTCGAGGTTTTTTATTTCTTTCTAAGTGGGTAC                         |
| KpnI-term-rev    | CTAGAAGGTACCCAATACATGTTTTTACCCGGATC                             |
| TF-noRnt1-fw     | GAGAGAAGTAGACTGAACAAGTCTC                                       |
| TF-noRnt1-rev    | CTCGACGAATCCTTTTCTGAGG                                          |
| TF-noT1-fw       | GAATTCTATGATCCGGGTAAAAAC                                        |
| TF-noT1mut-fw    | GAATTCTATGATCCTTGTA AAAACATG                                    |
| TF-noT1-rev      | GAGACTTGTTTCAGTCTACTTCTC                                        |
| RZ-fw            | CCTGTCACCGGATGTGTTTTTC                                          |
| RZ-rev           | CCTGTTTCGTCCTCACGGAC                                            |
| MutReb1BS        | TTTATTTGTCTTAAGAATTCTATGATCCTTGTA AAAACA<br>TGTATTGGGTACCCAATTC |
| MutReb1BS-anti   | GAATTGGGTACCCAATACATGTTTTTACAAGGATCATA<br>GAATTCTTAAGACAAATAAA  |
| noTF-fw          | GGTACCCAATTCGCCCTATAG                                           |
| noTF-rev         | CTCGACGAATCCTTTTCTGAGG                                          |
| A-fw             | CTTAAACTCCATGAAAGAAGG                                           |
| A-rev            | CTCGACGAATCCTTTTCTGAGG                                          |
| B-fw             | CAACTTAATCGCCTTGCAGCAC                                          |
| B-rev            | CATTCAGGCTGCGCAACTGTTG                                          |
| 3C-1             | GGCACCTGTCACTTTGGAA                                             |
| 3C-2             | GTCATGGAGTACAAGTGTGAGG                                          |
| 3C-3             | GAAAGCAGTTGAAGACAAGTTCG                                         |
| 3C-4             | GGGAATGTGGGAGGTCAGTGC                                           |
| 4A-1             | GAAGAGCTAGTTCAAACCTTGG                                          |
| 4A-2             | GACTTGTTTCAGTCTACTTCTC                                          |
| 4A-3             | GAGAAGTAGACTGAACAAGTC                                           |
| 4A-4             | CTGCGCAACTGTTGGGAAGGGC                                          |

**Supplementary Figure S1: Raw data for the graphs normalized towards  $\Delta$ TF in Figure 4B, 4C and 4D**

**Termination efficiency**

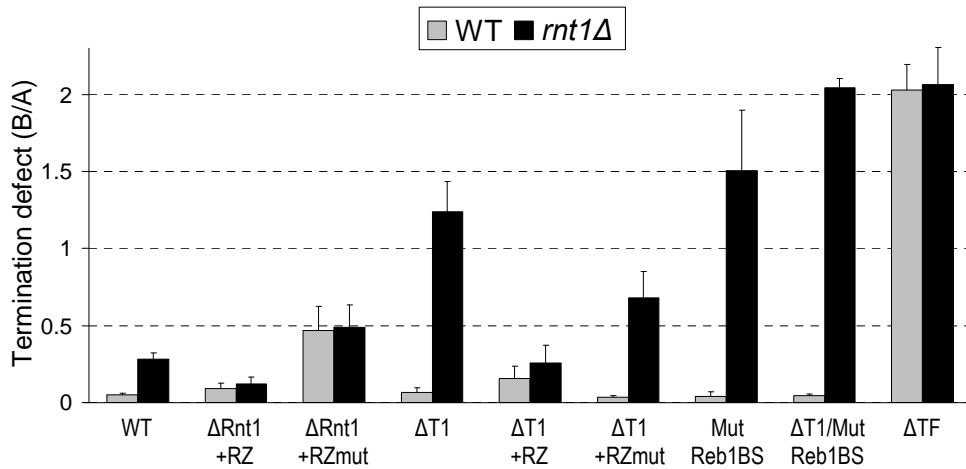

**Rat1/Sen1 effect**

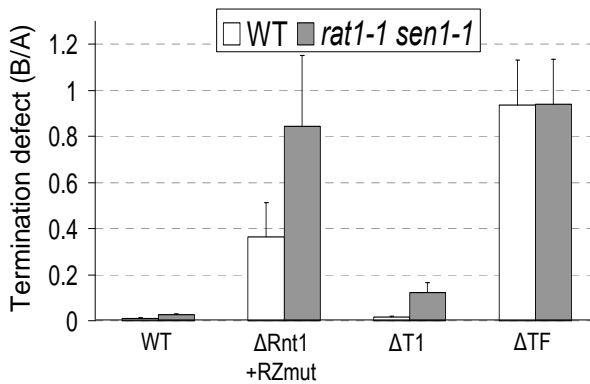

**Reb1p depletion**

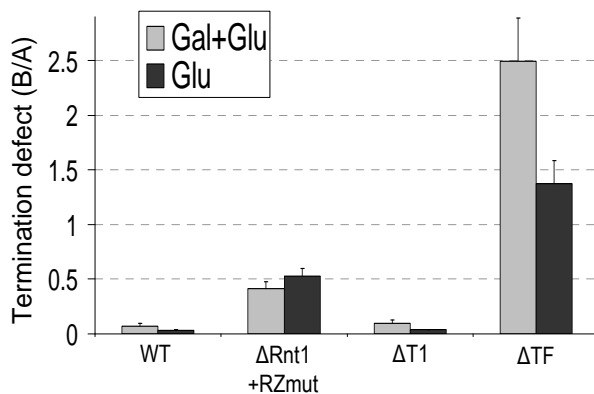

Supplement: supp_gkq894_Supplementary_data_combined.pdf [file supp_gkq894_Supplementary_data_combined.pdf]
